# Supplementary material for: Reovirus exerts potent oncolytic effects in head and neck cancer cell lines that are independent of signalling in the EGFR pathway
Source: PubMed Central journal article supplement (PMC3537694; doi:10.1186/1471-2407-12-368), 2012-08-24

ADDITIONAL FILE 2.

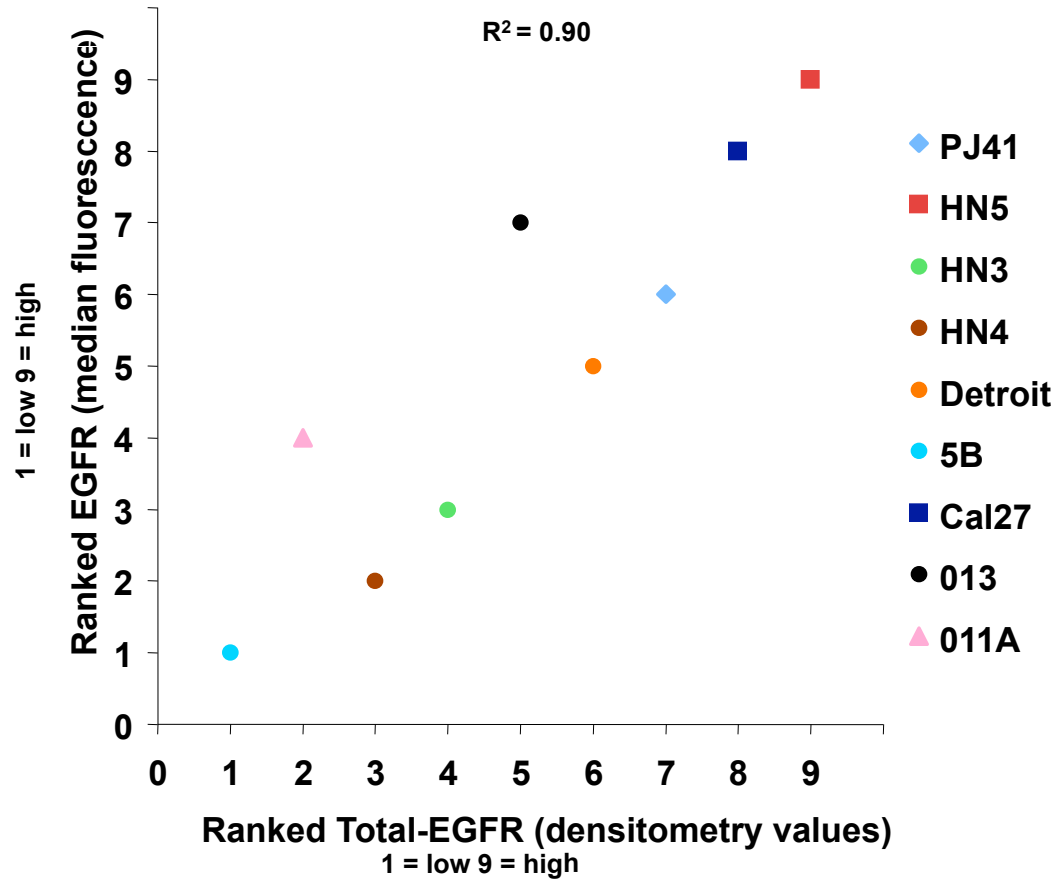

Supplement: 1471-2407-12-368-S3.pdf [file 1471-2407-12-368-S3.pdf]
