# Supplementary material for: Reovirus exerts potent oncolytic effects in head and neck cancer cell lines that are independent of signalling in the EGFR pathway
Source: PubMed Central journal article supplement (PMC3537694; doi:10.1186/1471-2407-12-368), 2012-08-24
Supplement: 1471-2407-12-368-S14.pdf [file 1471-2407-12-368-S14.pdf]

ADDITIONAL FILE 13.

**A.**

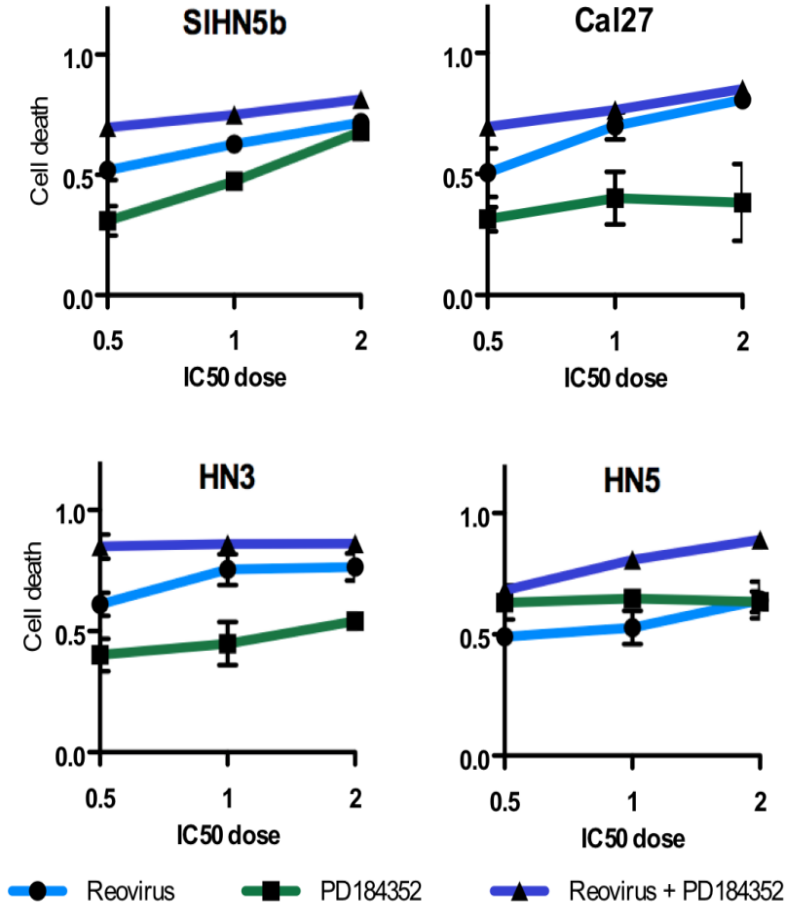

**B.**

|        | 2x    | 1x    | 0.5x  |
|--------|-------|-------|-------|
| Cal27  | 0.773 | 0.72  | 0.53  |
| HN3    | 0.478 | 0.242 | 0.14  |
| HN5    | 0.05  | 0.087 | 0.166 |
| SIHN5b | 0.56  | 0.524 | 0.412 |

|        |       |       |      |
|--------|-------|-------|------|
| Cal27  | ++    | ++    | +++  |
| HN3    | +++   | ++++  | ++++ |
| HN5    | +++++ | +++++ | ++++ |
| SIHN5b | +++   | +++   | +++  |

Synergy  
 Additive  
 Antagonism
